# Supplementary material
Source: publisher figshare collection journal article supplement (https://frontiersin.figshare.com/ndownloader/files/20178122)
Supplement: Supplementary file 1 [file 20178122]

S5: Supplementary Material 5: Reviewed publications for road ecology studies undertaken between 1954 and 2016 per African region.

| **Region in Africa** | **Year** | | | | | | | | | | | | | | | | | | | | | | | | | | | | | | | | **Total** |
| --- | --- | --- | --- | --- | --- | --- | --- | --- | --- | --- | --- | --- | --- | --- | --- | --- | --- | --- | --- | --- | --- | --- | --- | --- | --- | --- | --- | --- | --- | --- | --- | --- | --- |
| **1954** | **1955** | **1966** | **1968** | **1986** | **1988** | **1991** | **1992** | **1993** | **1994** | **1995** | **1996** | **1997** | **1998** | **1999** | **2000** | **2001** | **2002** | **2003** | **2004** | **2005** | **2006** | **2007** | **2008** | **2009** | **2010** | **2011** | **2012** | **2013** | **2014** | **2015** | **2016** |
| **Central** | - | - | - | - | - | - | - | - | - | - | - | - | - | - | 1 | 2 | - | 2 | - | 1 | 1 | 2 | 2 | 3 | 3 | 1 | 1 | 1 | 4 | 2 | 3 | 7 | **36** |
| **East** | - | - | - | - | 1 | - | - | - | - | - | 1 | - | - | - | 1 | - | - | 2 | 1 | - | - | 1 | 1 | 5 | 6 | 3 | 3 | 2 | 3 | 6 | 11 | 13 | **60** |
| **North** | - | - | - | - | - | - | - | - | - | - | - | - | - | - | 1 | - | - | 2 | - | 1 | - | - | - | 1 | 5 | - | - | - | 2 | 2 | 1 | 7 | **22** |
| **Southern** | 1 | 1 | 1 | 2 | - | 1 | 1 | - | 1 | 2 | - | 1 | 1 | 1 | 2 | 2 | - | 4 | 3 | 2 | 2 | 4 | 1 | 6 | 6 | 2 | 5 | 2 | 7 | 10 | 14 | 10 | **95** |
| **West** | - | - | - | - | - | - | 1 | 1 | - | - | - | - | - | 1 | 1 | - | 1 | 3 | - | - | - | 2 | 4 | 5 | 5 | 1 | 1 | 2 | 4 | 4 | 5 | 5 | **46** |
| **Total** | **1** | **1** | **1** | **2** | **1** | **1** | **2** | **1** | **1** | **2** | **1** | **1** | **1** | **2** | **6** | **4** | **1** | **13** | **4** | **4** | **3** | **9** | **8** | **20** | **25** | **7** | **10** | **7** | **20** | **24** | **34** | **42** |  |
